# Supplementary material
Source: publisher figshare collection journal article supplement (https://aacr.figshare.com/articles/dataset/_/23668540)
Supplement: Supplementary file 1 [file 41536723]

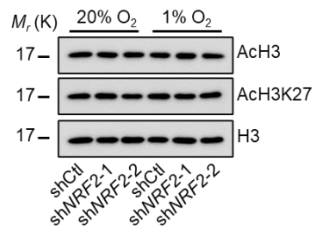

**Fig S6. Hypoxia shows no contribution to the NRF2 regulated histone acetylation.** Representative immunoblot of histone AcH3, and AcH3K27 in the histone extracts of shNRF2 HepG2 cells cultured under normoxia (21% O<sub>2</sub>) or hypoxia (1% O<sub>2</sub>).
